# Supplementary material for: The PDGFRβ/ERK1/2 pathway regulates CDCP1 expression in triple-negative breast cancer
Source: PubMed Central journal article supplement (PMC5967041; doi:10.1186/s12885-018-4500-9), 2018-05-23
Supplement: 12885_2018_4500_MOESM2_ESM.pdf [file 12885_2018_4500_MOESM2_ESM.pdf]

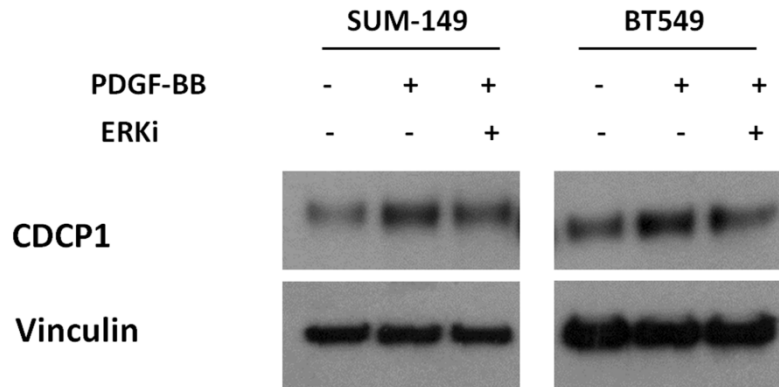

**Supplementary Fig. 2. PDGFR-BB stimulation upregulates CDCP1 in TNBC cells.** WB analysis of CDCP1 in SUM-149 and BT549 cells treated with or without the ERK1/2 inhibitor UO126 (2  $\mu$ M) and stimulated with or without PDGF-BB 20 ng/ml for 48 h. Monoclonal anti-vinculin antibody was used as the total protein loading control.
